# Supplementary material for: Identification of Factors Affecting Environmental Contamination Represented by Post-Hatching Eggshells of a Common Colonial Waterbird with Usage of Artificial Neural Networks
Source: MDPI journal article supplement (doi:10.3390/s22103723), 2022-05-13
Supplement: s1 [file s1]

## Supplementary material

Colony codes: GK – Gardzka Kępa (12), KR – Kąty Rybackie (12), BR – Brwilno near Płock (12), CH – Chutkowice (12), KS – Kiersity (12), GA – Gaładuś (12), GO – Gołdap (12), OS – Osiek (10), JS – Sławskie Lake (12), MO – Mosty (11), ZB – Zborowskie Lake (12), DD – Dzierżno Duże Lake (12), JA – Jawory (12), PO – Pogorzałki (10), MA – Malczyce (12), LI – Limajno Lake (12), KI – Kiełcz (12), RA – Raszyn (12), OT – Otmuchów (12), ST – Stobrawa (12), PL – Płoskinia (12), WR – Wrocław Zoo (4).

*Descriptions:* ARA\_LAND - Arable land, ARTIF\_AREAS - Artificial, non-agricultural vegetated areas, FORESTS- Forests, HET\_AGRO - Heterogeneous agricultural areas, INDUST\_UNITS- Industrial, commercial and transport units, INL\_WAT - Inland waters, INL\_WET - Inland wetlands, MAR\_WAT- Marine waters, MINE\_DUMP - Mines, dump and construction sites, OPEN\_SPACE - Open spaces with little or no vegetation, PASTURES – Pastures, PERM\_CROPS - Permanent crops, SCRUB\_VEGET - Scrub and/or herbaceous vegetation associations, URBAN FABRIC – Urban fabric

**Table S1.** Proportion of particular habitat types in a 20 km buffers around the studied colonies of grey herons. Habitat types according to the Corine Land Cover CLC2012 model.

| Code | ARA_LA<br>ND | ARTIF_A<br>REAS | FORESTS  | HET_AGR<br>O | INDUST_<br>UNITS | INL WAT  | INL_WET  | MAR_WA<br>T | MINE_DU<br>MP | OPEN_SP<br>ACE | PASTURE<br>S | PERM_CR<br>OPS | SCRUB_V<br>EGET | URBAN_F<br>ABRIC |
|------|--------------|-----------------|----------|--------------|------------------|----------|----------|-------------|---------------|----------------|--------------|----------------|-----------------|------------------|
| GK   | 0.257775     | 0.001202        | 0.308387 | 0.033062     | 0.002538         | 0.010272 | 0.018111 | 0.195427    | 0.000001      | 0.000186       | 0.14477      | 0.000201       | 0.006139        | 0.02193          |
| KR   | 0.288168     | 0.000295        | 0.051412 | 0.026879     | 0.000001         | 0.013441 | 0.007434 | 0.578013    | 0.000001      | 0.00247        | 0.010629     | 0.001064       | 0.00053         | 0.019667         |
| BR   | 0.450062     | 0.003617        | 0.272359 | 0.107853     | 0.013146         | 0.052205 | 0.00324  | 0.000001    | 0.000483      | 0.00102        | 0.027995     | 0.000517       | 0.034797        | 0.032707         |
| CH   | 0.592998     | 0.000001        | 0.191245 | 0.080271     | 0.000001         | 0.006997 | 0.000276 | 0.000001    | 0.000001      | 0.00022        | 0.083937     | 0.001765       | 0.006117        | 0.036173         |
| KS   | 0.648159     | 0.001472        | 0.136618 | 0.064268     | 0.001433         | 0.024771 | 0.012249 | 0.000001    | 0.005164      | 0.000001       | 0.077544     | 0.000421       | 0.008868        | 0.019033         |
| GA   | 0.343597     | 0.000223        | 0.202156 | 0.257713     | 0.00048          | 0.040344 | 0.003279 | 0.000001    | 0.000001      | 0.000001       | 0.124235     | 0.000431       | 0.014869        | 0.012671         |
| GO   | 0.394929     | 0.000001        | 0.346778 | 0.144692     | 0.001392         | 0.014256 | 0.003463 | 0.000001    | 0.000001      | 0.000001       | 0.060481     | 0.000001       | 0.025419        | 0.008588         |
| OS   | 0.346489     | 0.000947        | 0.458289 | 0.024796     | 0.000001         | 0.025101 | 0.000748 | 0.000001    | 0.000231      | 0.000001       | 0.099326     | 0.001343       | 0.022958        | 0.019773         |
| JS   | 0.338262     | 0.001800        | 0.482496 | 0.010593     | 0.001075         | 0.019955 | 0.002508 | 0.000001    | 0.000475      | 0.000001       | 0.094882     | 0.000001       | 0.010542        | 0.037408         |
| MO   | 0.110827     | 0.005996        | 0.232592 | 0.029777     | 0.014701         | 0.001142 | 0.004073 | 0.484395    | 0.000605      | 0.003922       | 0.039351     | 0.000001       | 0.001153        | 0.071465         |
| ZB   | 0.343782     | 0.000358        | 0.480979 | 0.046024     | 0.003126         | 0.005743 | 0.001025 | 0.000001    | 0.000973      | 0.000001       | 0.065841     | 0.000001       | 0.017365        | 0.034784         |
| DD   | 0.426361     | 0.008946        | 0.318893 | 0.025836     | 0.031172         | 0.008537 | 0.000001 | 0.000001    | 0.006565      | 0.000001       | 0.039201     | 0.000001       | 0.048201        | 0.086287         |
| JA   | 0.349504     | 0.000001        | 0.498988 | 0.034097     | 0.000001         | 0.014637 | 0.000305 | 0.000001    | 0.000001      | 0.000001       | 0.054046     | 0.000001       | 0.026854        | 0.021567         |
| PO   | 0.291319     | 0.004051        | 0.282753 | 0.07966      | 0.005775         | 0.005249 | 0.035403 | 0.000001    | 0.001933      | 0.000001       | 0.229229     | 0.000205       | 0.007508        | 0.056915         |
| MA   | 0.612809     | 0.003586        | 0.199514 | 0.034116     | 0.004476         | 0.010049 | 0.000208 | 0.000001    | 0.002005      | 0.000001       | 0.046808     | 0.001126       | 0.028146        | 0.057159         |
| LI   | 0.463806     | 0.002574        | 0.30875  | 0.057951     | 0.006636         | 0.022811 | 0.003158 | 0.000001    | 0.000001      | 0.000001       | 0.071088     | 0.000001       | 0.030257        | 0.032969         |
| KI   | 0.430211     | 0.002525        | 0.411499 | 0.035999     | 0.004432         | 0.007315 | 0.00128  | 0.000001    | 0.000588      | 0.000001       | 0.050219     | 0.001568       | 0.013958        | 0.040405         |
| RA   | 0.27574      | 0.046278        | 0.139279 | 0.086611     | 0.054652         | 0.013937 | 0.000001 | 0.000001    | 0.008095      | 0.001513       | 0.060199     | 0.012319       | 0.013571        | 0.287806         |
| OT   | 0.594428     | 0.004652        | 0.16694  | 0.071111     | 0.003291         | 0.026494 | 0.004947 | 0.000001    | 0.001672      | 0.000001       | 0.067686     | 0.000001       | 0.005873        | 0.052906         |
| ST   | 0.52346      | 0.002325        | 0.308152 | 0.011286     | 0.005896         | 0.015746 | 0.000001 | 0.000001    | 0.002794      | 0.000001       | 0.067916     | 0.00128        | 0.012988        | 0.048159         |
| PL   | 0.586828     | 0.000874        | 0.284584 | 0.044194     | 0.002612         | 0.002845 | 0.00651  | 0.009612    | 0.000001      | 0.000001       | 0.026838     | 0.000001       | 0.020151        | 0.01495          |
| WR   | 0.542616     | 0.032264        | 0.117008 | 0.026828     | 0.037269         | 0.010384 | 0.000001 | 0.000001    | 0.004568      | 0.000001       | 0.071213     | 0.001857       | 0.009283        | 0.14671          |

**Table S2.** Concentration of particular elements in post-hatching eggshells of grey herons in the studied colonies.

| Element | Al                      | As                      | Cd                      | Cr                      |
|---------|-------------------------|-------------------------|-------------------------|-------------------------|
| Code    | mean (range)<br>[mg/kg] | mean (range)<br>[mg/kg] | mean (range)<br>[µg/kg] | mean (range)<br>[mg/kg] |
| GK      | 3.80 (3.05-5.85)        | 0.28 (0-0.52)           | 6.6 (3.5-18.5)          | 0.11 (0.02-0.23)        |
| KR      | 16.09 (4.41-36.31)      | 0.31 (0-0.60)           | 14.9 (8.3-21.1)         | 0.51 (0.41-0.65)        |
| BR      | 12.31 (5.06-16.92)      | 0.39 (0.18-0.73)        | 14.1 (9.1-19.6)         | 0.46 (0.34-0.69)        |
| CH      | 13.97 (10.46-17.45)     | 0.30 (0.06-0.51)        | 12.7 (6.5-23.2)         | 0.45 (0.31-0.74)        |
| KS      | 13.33 (3.29-17.10)      | 0.46 (0.23-0.65)        | 10.4 (4.5-18.6)         | 0.33 (0.07-0.49)        |
| GA      | 13.31 (9.78-15.60)      | 0.36 (0.15-0.51)        | 6.4 (0-12.8)            | 0.02 (0-0.05)           |
| GO      | 18.11 (14.09-35.58)     | 0.44 (0-1.01)           | 6.9 (2.9-14.6)          | 0.04 (0-0.15)           |
| OS      | 12.28 (9.74-15.50)      | 0.31 (0-0.78)           | 7.2 (0-0.0140)          | 0.03 (0-0.12)           |
| JS      | 10.38 (2.56-28.70)      | 0.39 (0.22-1.26)        | 7.3 (0-16.2)            | 0.03 (0-0.13)           |
| MO      | 12.66 (8.92-27.43)      | 0.53 (0-1.32)           | 8.1 (2.5-14.9)          | 0.09 (0-0.24)           |
| ZB      | 9.13 (4.87-19.58)       | 0.48 (0.26-0.78)        | 10.7 (0-29.3)           | 0.04 (0-0.11)           |
| DD      | 8.37 (3.17-17.91)       | 0.38 (0.17-0.48)        | 5.2 (0-7.9)             | 0.08 (0-0.43)           |
| JA      | 10.87 (7.73-27.40)      | 0.89 (0.54-1.13)        | 37.5 (28.4-48.7)        | 0.06 (0-0.19)           |
| PO      | 6.18 (5.36-7.31)        | 0.75 (0.33-1.28)        | 43.7 (34.9-56.3)        | 0.16 (0-0.35)           |
| MA      | 16.02 (8.72-28.99)      | 1.07 (0.45-1.37)        | 43.6 (33.9-57.7)        | 0.11 (0-0.27)           |
| LI      | 8.27 (5.00-17.51)       | 0.77 (0-1.08)           | 29.9 (11.1-46.1)        | 0.25 (0-0.39)           |
| KI      | 12.02 (7.51-17.51)      | 0.46 (0.23-0.64)        | 37.2 (28.8-46.3)        | 0.09 (0-0.18)           |
| RA      | 6.79 (5.19-11.08)       | 0.63 (0-0.94)           | 22.8 (9.8-37.5)         | 0.09 (0-0.23)           |
| OT      | 13.45 (5.57-33.13)      | 0.70 (0-1.29)           | 32.3 (22.2-42.2)        | 0.08 (0-0.22)           |
| ST      | 11.18 (5.55-43.17)      | 1.00 (0.59-1.40)        | 36.0 (22.1-50.4)        | 0.05 (0-0.18)           |
| PL      | 13.83 (5.82-61.55)      | 0.51 (0-1.26)           | 25.3 (15.7-35.9)        | 0.07 (0-0.19)           |
| WR      | 14.34 (5.99-32.89)      | 0.91 (0.53-1.20)        | 27.7 (22.6-31.1)        | 0.06 (0-0.21)           |
|         | Cu                      | Fe                      | Hg                      | Mn                      |
|         | mean (range)<br>[mg/kg] | mean (range)<br>[mg/kg] | mean (range)<br>[mg/kg] | mean (range)<br>[mg/kg] |
| GK      | 1.51 (0.80-1.91)        | 5.11 (2.75-10.64)       | 0.08 (0.02-0.15)        | 1.12 (0.46-1.94)        |
| KR      | 2.90 (2.31-3.49)        | 9.98 (4.74-26.41)       | 0.15 (0-0.71)           | 1.60 (0.75-2.68)        |
| BR      | 2.74 (2.33-3.69)        | 8.34(6.05-10.08)        | 0.12 (0.04-0.19)        | 1.74 (0.91-2.76)        |
| CH      | 2.35 (2.05-3.09)        | 9.02 (6.91-11.66)       | 0.13 (0.03-0.16)        | 2.72 (1.49-5.04)        |
| KS      | 2.14 (0-2.48)           | 6.36 (4.70-7.76)        | 0.09 (0.05-0.14)        | 1.97 (0.67-4.72)        |
| GA      | 2.04 (1.07-5.61)        | 5.84 (3.16-13.44)       | 0.11 (0-0.17)           | 1.14 (0.55-2.12)        |
| GO      | 1.51 (1.18-1.79)        | 4.64 (2.42-9.34)        | 0.09 (0.05-0.16)        | 2.13 (0.41-2.79)        |
| OS      | 1.42 (0.85-1.99)        | 3.90 (2.44-6.71)        | 0.09 (0-0.17)           | 0.72 (0.33-1.28)        |
| JS      | 1.45 (0.91-1.79)        | 3.25 (1.76-4.89)        | 0.10 (0.03-0.17)        | 1.71 (0.43-3.94)        |
| MO      | 1.62 (1.17-2.12)        | 18.89 (2.15-85.26)      | 0.08 (0.03-0.13)        | 4.46 (0.53-17.14)       |
| ZB      | 1.75 (1.21-2.06)        | 8.27 (4.24-17.06)       | 0.12 (0.05-0.23)        | 4.17 (0.36-27.28)       |
| DD      | 1.20 (0.79-1.53)        | 8.20 (4.07-19.27)       | 0.09 (0.06-0.14)        | 1.34 (0.61-3.61)        |
| JA      | 1.67 (1.19-1.98)        | 10.65 (6.45-31.19)      | 0.29 (0.09-0.82)        | 5.59 (1.69-13.25)       |
| PO      | 1.89 (1.68-2.25)        | 6.67 (5.05-8.68)        | 0.24 (0.13-0.31)        | 0.59 (0.35-1.31)        |
| MA      | 1.33 (0.95-1.69)        | 19.37 (8.85-38.82)      | 0.22 (0.12-0.32)        | 1.92 (0.85-5.69)        |
| LI      | 1.18 (0.73-1.41)        | 7.52 (4.15-10.91)       | 0.30 (0.14-0.74)        | 1.49 (0.78-2.59)        |
| KI      | 1.52 (1.28-1.71)        | 14.71 (7.29-31.89)      | 0.25 (0.14-0.33)        | 4.89 (1.65-17.56)       |
| RA      | 1.11 (0.74-1.58)        | 8.51 (6.11-13.66)       | 0.20 (0.09-0.34)        | 4.29 (0.96-16.17)       |
| OT      | 1.49 (0.88-1.78)        | 12.35 (5.67-38.71)      | 0.26 (0.13-0.37)        | 6.04 (1.01-11.26)       |
| ST      | 1.22 (0-1.85)           | 9.46 (5.78-16.69)       | 0.23 (0.13-0.29)        | 3.63 (0.83-7.13)        |
| PL      | 1.67 (1.21-2.02)        | 5.04 (2.97-7.95)        | 0.16 (0.08-0.21)        | 1.98 (0.93-3.42)        |
| WR      | 1.64 (1.48-1.93)        | 5.35 (4.77-6.41)        | 0.17 (0.11-0.24)        | 0.77 (0.38-1.01)        |

**Table S2. Count.**

| Element | Mo                      | Ni                      | Pb                      | Sc                      |
|---------|-------------------------|-------------------------|-------------------------|-------------------------|
| Code    | mean (range)<br>[mg/kg] | mean (range)<br>[mg/kg] | mean (range)<br>[mg/kg] | mean (range)<br>[mg/kg] |
| GK      | 0.032 (0-0.099)         | 0.12 (0.04-0.25)        | 0.57 (0.39-0.77)        | 0.005 (0-0.019)         |
| KR      | 0.092 (0.042 - 0.189)   | 0.18 (0.03-0.27)        | 0.66 (0.36-0.93)        | 0.019 (0-0.044)         |
| BR      | 0.069 (0.021-0.120)     | 0.19 (0.06-0.28)        | 0.55 (0.45-0.75)        | 0.014 (0.005-0.027)     |
| CH      | 0.064 (0.024-0.133)     | 0.22 (0.14-0.31)        | 0.46 (0.12-0.89)        | 0.016 (0.006-0.032)     |
| KS      | 0.045 (0-0.081)         | 0.19 (0.05-0.27)        | 0.47 (0.25-0.68)        | 0.021 (0-0.045)         |
| GA      | 0.010 (0-0.052)         | 0.14 (0.10-0.21)        | 0.32 (0.05-0.63)        | 0.014 (0-0.030)         |
| GO      | 0.010 (0-0.027)         | 0.14 (0.07-0.18)        | 0.51 (0.37-0.69)        | 0.019 (0-0.039)         |
| OS      | 0.010 (0-0.029)         | 0.12 (0.09-0.16)        | 0.51 (0.25-0.76)        | 0.014 (0-0.026)         |
| JS      | 0.015 (0-0.046)         | 0.0935 (0-0.1481)       | 0.42 (0.26-0.57)        | 0.005 (0-0.019)         |
| MO      | 0.008 (0-0.042)         | 0.130 (0.095-0.174)     | 0.48 (0.25-0.60)        | 0.007 (0-0.018)         |
| ZB      | 0.011 (0-0.036)         | 0.067 (0-0.232)         | 0.49 (0.27-1.34)        | 0.003 (0-0.011)         |
| DD      | 0.015 (0-0.051)         | 0.0142 (0-0.0776)       | 0.53 (0.28-0.83)        | 0.004 (0-0.021)         |
| JA      | 0.043 (0-0.212)         | 0.162 (0.122-0.186)     | 0.534 (0.085-1.106)     | 0.097 (0.042-0.168)     |
| PO      | 0.024 (0-0.060)         | 0.152 (0.137-0.177)     | 0.448 (0.088-0.626)     | 0.037 (0-0.085)         |
| MA      | 0.029 (0-0.117)         | 0.137 (0.101-0.184)     | 0.398 (0.124-0.908)     | 0.077 (0.034-0.164)     |
| LI      | 0.023 (0-0.190)         | 0.130 (0.111-0.155)     | 0.457 (0.096-0.851)     | 0.055 (0.021-0.104)     |
| KI      | 0.005 (0-0.058)         | 0.135 (0.111-0.159)     | 0.634 (0.232-1.087)     | 0.110 (0-0.186)         |
| RA      | 0.008 (0-0.097)         | 0.129 (0.111-0.172)     | 0.531 (0.231-0.883)     | 0.080 (0.013-0.165)     |
| OT      | 0.019 (0-0.072)         | 0.115 (0.094-0.160)     | 0.416 (0.125-0.723)     | 0.067 (0-0.200)         |
| ST      | 0.018 (0-0.086)         | 0.121 (0.091-0.157)     | 0.372 (0-0.657)         | 0.081 (0.035-0.157)     |
| PL      | 0.014 (0-0.049)         | 0.122 (0.103-0.151)     | 0.366 (0.037-0.801)     | 0.044 (0.025-0.072)     |
| WR      | 0.018 (0-0.052)         | 0.122 (0.106-0.138)     | 0.415 (0.228-0.538)     | 0.056 (0.035-0.075)     |
|         | Se                      | Sr                      | V                       | Zn                      |
|         | mean (range)<br>[ppm]   | mean (range)<br>[ppm]   | mean (range)<br>[µg/kg] | mean (range)<br>[mg/kg] |
| GK      | 0.577 (0.186-1.121)     | 151.17 (81.74-203.68)   | 55.5 (0-142.0)          | 3.39 (1.21-6.63)        |
| KR      | 0.927 (0.193-2.508)     | 186.28 (94.77-265.19)   | 26.0 (0-88.1)           | 7.74 (5.14-10.49)       |
| BR      | 0.493 (0.243-0.884)     | 85.16 (55.69-112.26)    | 33.4 (0-168.5)          | 9.15 (6.12-16.86)       |
| CH      | 0.484 (0.037-0.938)     | 60.36 (26.37-83.65)     | 28.2 (0-89.8)           | 9.59 (6.36-18.12)       |
| KS      | 0.573 (0.132-0.959)     | 75.35 (42.46-129.62)    | 21.9 (0-144.0)          | 5.63 (2.74-7.94)        |
| GA      | 0.441 (0.204-0.801)     | 47.61 (26.36-95.19)     | 23.8 (0-95.1)           | 8.49 (0.09-15.28)       |
| GO      | 0.539 (0.252-0.936)     | 41.76 (31.39-60.10)     | 25.6 (0-94.3)           | 7.36 (1.86-14.62)       |
| OS      | 0.565 (0-0.793)         | 83.87 (31.59-125.59)    | 69.4 (0-158.5)          | 5.63 (2.83-10.98)       |
| JS      | 0.5151 (0.2126-0.9887)  | 60.21 (43.85-86.45)     | 32.0 (0-122.6)          | 4.18 (1.77-7.26)        |
| MO      | 0.552 (0.315-0.876)     | 232.90 (152.10-336.48)  | 50.8 (0-126.9)          | 5.50 (2.37-12.02)       |
| ZB      | 0.614 (0.314-0.966)     | 136.39 (68.43-207.66)   | 50.5 (0-123.5)          | 12.21 (7.98-20.75)      |
| DD      | 0.6451 (0.1616-0.9659)  | 193.46 (138.60-223.18)  | 33.1 (0-87.9)           | 5.02 (2.93-7.81)        |
| JA      | 0.601 (0.259-1.063)     | 72.94 (41.77-93.45)     | 13.32 (0-358.9)         | 26.12 (20.03-45.04)     |
| PO      | 0.526 (0.032-1.041)     | 45.55 (28.97-64.75)     | 159.2 (96.6-258.2)      | 6.99 (2.19-14.47)       |
| MA      | 0.716 (0.2908-1.4359)   | 60.69 (38.86-83.71)     | 163.9 (13.3-298.5)      | 5.55 (3.29-9.05)        |
| LI      | 1.386 (0-3.696)         | 55.59 (32.76-91.93)     | 5.4 (0-202.6)           | 24.96 (13.62-35.07)     |
| KI      | 2.163 (1.518-2.589)     | 60.44 (30.87-80.41)     | 169.9 (37.2-283.9)      | 20.93 (7.85-33.49)      |
| RA      | 2.094 (1.458-2.719)     | 50.69 (36.46-78.37)     | 94.3 (0-248.3)          | 20.07 (13.33-31.81)     |
| OT      | 1.960 (1.426-2.410)     | 69.57 (38.69-120.03)    | 133.9 (0-267.0)         | 6.23 (3.37-9.98)        |
| ST      | 1.9251 (1.2553-2.7669)  | 70.46 (48.65-93.94)     | 140.5 (15.2-269.3)      | 12.83 (4.26-26.88)      |
| PL      | 1.8099 (1.0937-2.4916)  | 83.90 (58.59-146.86)    | 116.9 (0-283.5)         | 5.25 (2.08-9.42)        |
| WR      | 2.148 (1.810-2.612)     | 63.35 (42.006-85.087)   | 210.3 (158.1-243.8)     | 13.09 (5.82-16.25)      |

Concentrations of Ca and Mg – main components of an eggshell ranged between 334.11-370.26 g/kg and 0.89-1.27 g/kg, respectively.
